# Supplementary material for: Proposed Protocol for Field Testing of Endurance Fitness of Young Labrador Retrievers
Source: MDPI journal article supplement (doi:10.3390/mps6040061), 2023-06-28
Supplement: s1 [file s1]

## FITNESS TEST

Test session • 1<sup>st</sup> at 16 weeks, • 2<sup>nd</sup> at 20 weeks, • 3<sup>rd</sup> at 24 weeks, • 4<sup>th</sup> at 28 weeks

Date \_\_\_\_\_

Name of dog \_\_\_\_\_

Date of birth/age \_\_\_\_\_

Weight \_\_\_\_\_

|                  | BASE  | POST1 | POST2 | REC   | BL 5-8 min after<br>200 m sprint |
|------------------|-------|-------|-------|-------|----------------------------------|
| HR               |       |       |       |       | -----                            |
| BL               |       |       |       | ----- |                                  |
| Time             |       |       |       |       |                                  |
| Running<br>Speed | ----- |       |       | ----- | -----                            |
| Running<br>time  | ----- |       |       | ----- | -----                            |

Notes:

**Supplementary Figure 1.** Form for use in recording measurement results.
